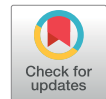

# Disclosures: *Standards of Care in Diabetes—2023*

*Diabetes Care* 2023;46(Suppl. 1):S281–S284 | <https://doi.org/10.2337/dc23-SDIS>

## Committee members disclosed the following financial or other conflicts of interest (COI) covering the period 12 months before December 2022

| Member                                                               | Employment                                                                                                       | Research grant                                              | Other research support  | Speakers' bureau/honoraria | Ownership interest | Consultant/advisory board                                    | Other                                                                                                                                                                                                                                                                                                                                                                                                                                                                                                                                     |
|----------------------------------------------------------------------|------------------------------------------------------------------------------------------------------------------|-------------------------------------------------------------|-------------------------|----------------------------|--------------------|--------------------------------------------------------------|-------------------------------------------------------------------------------------------------------------------------------------------------------------------------------------------------------------------------------------------------------------------------------------------------------------------------------------------------------------------------------------------------------------------------------------------------------------------------------------------------------------------------------------------|
| <b>American Diabetes Association Professional Practice Committee</b> |                                                                                                                  |                                                             |                         |                            |                    |                                                              |                                                                                                                                                                                                                                                                                                                                                                                                                                                                                                                                           |
| Nuha A. ElSayed (Chair)§                                             | American Diabetes Association                                                                                    | None                                                        | None                    | None                       | None               | Expert, World Health Organization                            | Endocrinologist, Joslin Diabetes Center<br>Chair, Diabetes Education for All                                                                                                                                                                                                                                                                                                                                                                                                                                                              |
| Grazia Aleppo                                                        | Northwestern University Feinberg School of Medicine Division of Endocrinology, Metabolism and Molecular Medicine | Dexcom#, Eli Lilly#, Fractyl Health#, Insulet/Self#, Emmes# | Emmes, Fractyl, Welldoc | Dexcom, Insulet/Self       | None               | Bayer, Dexcom, Eli Lilly, Insulet, Medscape                  | Associate Editor, <i>Diabetes Technology &amp; Therapeutics</i>                                                                                                                                                                                                                                                                                                                                                                                                                                                                           |
| Vanita R. Aroda                                                      | Brigham and Women's Hospital Faculty, Harvard Medical School                                                     | Applied Therapeutics#, Eli Lilly#, Fractyl#, Novo Nordisk#  | None                    | None                       | None               | Applied Therapeutics, Fractyl, Novo Nordisk*, Pfizer, Sanofi | Spouse Sandip Datta, MD, Senior Medical Director, Early Development, Infectious Diseases, May 2020 to present, Janssen Pharmaceutical Companies of Johnson & Johnson<br>Consultant/educational activities: Associate Editor, <i>Diabetes Care</i> ; Member of the Writing Group for "Management of Hyperglycemia in Type 2 Diabetes, 2022. Consensus Report by the American Diabetes Association (ADA) and the European Association for the Study of Diabetes (EASD)"<br>Novo Nordisk* (received other Industry benefits, such as travel) |
| Raveendhara R. Bannuru (Chief Methodologist)§                        | American Diabetes Association                                                                                    | None                                                        | None                    | None                       | None               | None                                                         | None                                                                                                                                                                                                                                                                                                                                                                                                                                                                                                                                      |
| Florence M. Brown                                                    | Joslin Diabetes Center                                                                                           | None                                                        | Dexcom                  | None                       | None               | None                                                         | None                                                                                                                                                                                                                                                                                                                                                                                                                                                                                                                                      |

Continued on p. S282

| Member             | Employment                                                                                                       | Research grant                                                                                                                                         | Other research support | Speakers' bureau/honoraria                     | Ownership interest | Consultant/advisory board                                                                        | Other                                                                                                                                                                                                                                                                                   |
|--------------------|------------------------------------------------------------------------------------------------------------------|--------------------------------------------------------------------------------------------------------------------------------------------------------|------------------------|------------------------------------------------|--------------------|--------------------------------------------------------------------------------------------------|-----------------------------------------------------------------------------------------------------------------------------------------------------------------------------------------------------------------------------------------------------------------------------------------|
| Dennis Bruemmer    | Cleveland Clinic Lerner College of Medicine, Case Western Reserve University                                     | Novartis                                                                                                                                               | None                   | None                                           | None               | Intellisphere, Esperion (advisory board)                                                         | HCPLive/sponsored continuing medical education                                                                                                                                                                                                                                          |
| Billy S. Collins   | CDR, U.S. Public Health Service                                                                                  | None                                                                                                                                                   | None                   | None                                           | None               | None                                                                                             | None                                                                                                                                                                                                                                                                                    |
| Marisa E. Hilliard | Baylor College of Medicine Texas Children's Hospital                                                             | None                                                                                                                                                   | JDRF                   | None                                           | None               | None                                                                                             | Springer Publishing (book royalties)<br>Associate Editor, American Psychological Association<br>Member, Clinical & Research Advisory Committee;<br>College Diabetes Network<br>Member, External Registry & Research Committee;<br>T1D Exchange Mental Health Diabetes Education Program |
| Diana Isaacs       | Cleveland Clinic Endocrinology & Metabolism Institute                                                            | None                                                                                                                                                   | None                   | Abbott, Dexcom, Medtronic, Novo Nordisk, Bayer | None               | Insulet, Eli Lilly, Sanofi, Klinio, Undermyfork                                                  | Board of Directors, Association of Diabetes Care and Education Specialists<br>Clinical Practice Guideline Oversight Committee, American Association of Clinical Endocrinology                                                                                                           |
| Eric L. Johnson    | University of North Dakota School of Medicine and Health Sciences<br>Altru Health System                         | None                                                                                                                                                   | None                   | None                                           | None               | None                                                                                             | Editorial Board, <i>Clinical Diabetes</i>                                                                                                                                                                                                                                               |
| Scott Kahan        | George Washington University Milken Institute School of Public Health<br>National Center for Weight and Wellness | None                                                                                                                                                   | None                   | None                                           | None               | Vivus, Eli Lilly, Novo Nordisk, Currax, Gelesis, Medscape                                        | (All without compensation)<br>Board of Directors, The Obesity Society<br>Board of Directors, Obesity Action Coalition<br>Advocacy and Public Outreach Core Committee, Endocrine Society                                                                                                 |
| Kamlesh Khunti     | University of Leicester Leicester Diabetes Centre<br>Leicester General Hospital                                  | Boehringer Ingelheim#, Applied Therapeutics, AstraZeneca#, Novartis#, Novo Nordisk#, Oramed Pharmaceuticals, Sanofi#, Eli Lilly#, Merck Sharp & Dohme# | None                   | None                                           | None               | AstraZeneca, Bayer, Eli Lilly, Merck Sharp & Dohme, Novartis, Novo Nordisk, Boehringer Ingelheim | None                                                                                                                                                                                                                                                                                    |
| Jose Leon          | National Center for Health in Public Housing                                                                     | None                                                                                                                                                   | None                   | None                                           | None               | None                                                                                             | None                                                                                                                                                                                                                                                                                    |

Continued on p. S283

| Member                                                                                                                               | Employment                                                                       | Research grant            | Other research support | Speakers' bureau/honoraria | Ownership interest                          | Consultant/advisory board                                                                                                                                                                                                                             | Other                                                                                                                                                                                                                                                                                                     |
|--------------------------------------------------------------------------------------------------------------------------------------|----------------------------------------------------------------------------------|---------------------------|------------------------|----------------------------|---------------------------------------------|-------------------------------------------------------------------------------------------------------------------------------------------------------------------------------------------------------------------------------------------------------|-----------------------------------------------------------------------------------------------------------------------------------------------------------------------------------------------------------------------------------------------------------------------------------------------------------|
| Sarah K. Lyons                                                                                                                       | Baylor College of Medicine<br>Texas Medical Center<br>Diabetes and Endocrinology | None                      | None                   | None                       | Eli Lilly (parent stockholder) <sup>†</sup> | None                                                                                                                                                                                                                                                  | Unpaid Board Member, Epic's Pediatric Endocrinology Steering Board<br>Volunteer member, Clinical and Research Advisor Committee of College Diabetes Network<br>Volunteer member, Publications Committee on the T1D Exchange Quality Improvement Collaborative                                             |
| Mary Lou Perry                                                                                                                       | UVA Heart and Vascular Center-Morrison's Compass Group                           | None                      | None                   | None                       | None                                        | LifeScan Diabetes Institute                                                                                                                                                                                                                           | Editorial Board Member, <i>Diabetes Spectrum</i>                                                                                                                                                                                                                                                          |
| Priya Prahalad                                                                                                                       | Stanford Hospital and Clinics<br>Lucile Packard Children's Hospital              | None                      | None                   | None                       | None                                        | None                                                                                                                                                                                                                                                  | Unpaid Board Member on Epic's Pediatric Endocrinology Steering Board                                                                                                                                                                                                                                      |
| Richard E. Pratley                                                                                                                   | Advent Health Translational Research Institute                                   | Novo Nordisk <sup>#</sup> | None                   | Novo Nordisk <sup>#</sup>  | None                                        | Bayer AG <sup>#</sup> , Gashbrum Bio <sup>#</sup> , Hanmi Pharmaceutical <sup>#</sup> , Hengrui (USA) <sup>#</sup> , Merck <sup>#</sup> , Novo Nordisk <sup>#</sup> , Rivus Pharmaceuticals <sup>#</sup> , Sun Pharmaceutical Industries <sup>#</sup> | Editorial Board Member, <i>Diabetes Care</i><br>Board Member, International Geriatric Diabetes Society                                                                                                                                                                                                    |
| Jane Jeffrie Seley                                                                                                                   | Weill Cornell Medicine                                                           | None                      | None                   | None                       | None                                        | None                                                                                                                                                                                                                                                  | Director of Strategy, Diabetes Technology Society<br>Associate Editor, <i>Diabetes Spectrum</i><br>Section Co-editor, <i>Current Diabetes Reports</i><br>Editor, <i>Journal of Diabetes Science and Technology</i><br>Editor, <i>BMJ Open Diabetes Research &amp; Care</i><br>LifeScan Diabetes Institute |
| Robert C. Stanton                                                                                                                    | Joslin Diabetes Center                                                           | None                      | None                   | None                       | None                                        | None                                                                                                                                                                                                                                                  | None                                                                                                                                                                                                                                                                                                      |
| Robert A. Gabbay <sup>§</sup>                                                                                                        | American Diabetes Association                                                    | None                      | None                   | None                       | None                                        | Onduo*, HealthReveal, Lark, Vida Health*                                                                                                                                                                                                              | Spouse Christi Gabbay, CHSE, Managing Director, Major Gifts and Philanthropy at American Diabetes Association<br>Senior volunteer, Joslin Diabetes Center                                                                                                                                                 |
| <b>American College of Cardiology Designated Representatives and Staff (Section 10 "Cardiovascular Disease and Risk Management")</b> |                                                                                  |                           |                        |                            |                                             |                                                                                                                                                                                                                                                       |                                                                                                                                                                                                                                                                                                           |
| Sandeep R. Das                                                                                                                       | University of Texas Southwestern Medical Center                                  | None                      | None                   | None                       | None                                        | None                                                                                                                                                                                                                                                  | Associate Editor, <i>Circulation</i>                                                                                                                                                                                                                                                                      |

Continued on p. S284

| Member                                     | Employment                                                                              | Research grant                                                     | Other research support                              | Speakers' bureau/honoraria                                   | Ownership interest | Consultant/advisory board                                                                                                                                                                                                                            | Other |
|--------------------------------------------|-----------------------------------------------------------------------------------------|--------------------------------------------------------------------|-----------------------------------------------------|--------------------------------------------------------------|--------------------|------------------------------------------------------------------------------------------------------------------------------------------------------------------------------------------------------------------------------------------------------|-------|
| Mikhail Kosiborod                          | Saint Luke's Mid America Heart Institute                                                | AstraZeneca#, Boehringer Ingelheim#                                | AstraZeneca#                                        | None                                                         | None               | Alnylam, Amgen*, Applied Therapeutics#, AstraZeneca*#, Bayer*, Boehringer Ingelheim*, Cytokinetics, Eli Lilly, Esperion Therapeutics, Janssen#*, Lexicon, Merck (Diabetes and Cardiovascular), Novo Nordisk*#, Pharmacosmos, Sanofi*, Vifor Pharma*# | None  |
| <b>American Diabetes Association Staff</b> |                                                                                         |                                                                    |                                                     |                                                              |                    |                                                                                                                                                                                                                                                      |       |
| Malaika I. Hill                            | American Diabetes Association                                                           | None                                                               | None                                                | None                                                         | None               | None                                                                                                                                                                                                                                                 | None  |
| Laura S. Mitchell                          | American Diabetes Association                                                           | None                                                               | None                                                | None                                                         | None               | None                                                                                                                                                                                                                                                 | None  |
| <b>Designated Subject Matter Experts</b>   |                                                                                         |                                                                    |                                                     |                                                              |                    |                                                                                                                                                                                                                                                      |       |
| Kenneth Cusi                               | University of Florida                                                                   | Echosens#, Inventiva#, Novo Nordisk#, Poxel#, Labcorp#, and Zydus# | None                                                | None                                                         | None               | Altimmune, Arrowhead, AstraZeneca, 89Bio, Bristol-Myers Squibb, Lilly, Madrigal, Merck, Novo Nordisk, ProSciento, Quest, Sagimet Biosciences, Sonic Incytes, Terns                                                                                   | None  |
| Jason L. Gaglia                            | Joslin Diabetes Center Harvard Medical School                                           | None                                                               | None                                                | None                                                         | None               | None                                                                                                                                                                                                                                                 | None  |
| Christopher H. Gibbons                     | Beth Israel Deaconess Medical Center                                                    | Grifols                                                            | Grifols                                             | None                                                         | CND Life Sciences  | None                                                                                                                                                                                                                                                 | None  |
| John M. Giurini                            | Beth Israel Deaconess Medical Center                                                    | None                                                               | None                                                | None                                                         | None               | None                                                                                                                                                                                                                                                 | None  |
| Lisa Murdock                               | American Diabetes Association                                                           | None                                                               | None                                                | None                                                         | None               | None                                                                                                                                                                                                                                                 | None  |
| Jennifer K. Sun                            | Joslin Diabetes Center                                                                  |                                                                    | Novo Nordisk, Boehringer Ingelheim, Genentech/Roche | Jaeb Center for Health Research/ National Eye Insitute, JDRF | Genentech/ Roche   | None                                                                                                                                                                                                                                                 | None  |
| Crystal C. Woodward                        | American Diabetes Association                                                           | None                                                               | None                                                | None                                                         | None               | None                                                                                                                                                                                                                                                 | None  |
| Deborah Young-Hyman                        | Office of Behavioral Health and Social Sciences Research, National Institutes of Health | None                                                               | None                                                | None                                                         | None               | None                                                                                                                                                                                                                                                 | None  |
| Zobair Younossi                            | Inova Fairfax Medical Campus, Inova Health System, Falls Church, VA                     | None                                                               | None                                                | None                                                         | None               | None                                                                                                                                                                                                                                                 | None  |

\*≥\$10,000 per year from company to individual. #Grant or contract is to university or other employer. †Disclosure made after committee member began work on the SOC 2022 update. §Nuha A. ElSayed, Raveendhara R. Bannuru, and Robert A. Gabbay are also American Diabetes Association staff.
